# Supplementary material for: Child Autistic Traits, Food Selectivity, and Diet Quality: A Population-Based Study
Source: PubMed Central journal article supplement — J Nutr. 2021 Dec 6;152(3):856–62. doi: 10.1093/jn/nxab413 (PMC8891181; doi:10.1093/jn/nxab413), 2021-12-06

**Supplementary Table 1.** Food fussiness subscale from the Children's Eating Behaviour

Questionnaire used to assess 'food selectivity' in the current study

---

| # | Item                                                                    |
|---|-------------------------------------------------------------------------|
| 1 | My child refuses new foods at first                                     |
| 2 | My child enjoys tasting new foods*                                      |
| 3 | My child enjoys a wide variety of foods*                                |
| 4 | My child is difficult to please with meals                              |
| 5 | My child is interested in tasting food s/he hasn't tasted before*       |
| 6 | My child decides that s/he doesn't like a food, even without tasting it |

---

\*Indicates reverse-scored items; items are scored on a 5-point Likert scale from 1 (*Never*) to 5 (*Always*)

**Supplementary Table 2.** Non-imputed population characteristics<sup>1</sup>

| <b>Child</b>                        |                | <i>N</i> |
|-------------------------------------|----------------|----------|
| Sex, % boys                         | 2027 (49.4)    | 4092     |
| Birthweight, g                      | 3445.2 ± 570.2 | 4088     |
| Ethnicity, % Dutch                  | 2824 (69.2)    | 4082     |
| BMIz <sup>2</sup> , 6 y             | 0.2 ± 0.8      | 3713     |
| Age at diet quality assessment, y   | 8.1 ± 0.2      | 4085     |
| Energy intake <sup>3</sup> , kcal/d | 1483.8 ± 371.5 | 4092     |
| <b>Mother</b>                       |                | <i>N</i> |
| Age at inclusion, y                 | 31.8 ± 4.4     | 4092     |
| Educational level <sup>4</sup>      |                | 3948     |
| High                                | 1376 (34.9)    |          |
| Mid- high                           | 1042 (26.4)    |          |
| Mid- low                            | 1043 (26.4)    |          |
| Low                                 | 487 (12.3)     |          |

<sup>1</sup>Values are mean ± SD or frequency (percent); <sup>2</sup>Sex- and age-adjusted Body Mass Index (BMIz) standard deviation score calculated using Dutch Reference growth curves (30); <sup>3</sup>Derived from Food Frequency Questionnaire at 8 y; <sup>4</sup>Education levels include: low (<3 years of secondary school), mid-low (>3 years of secondary school; intermediate vocational training; first year of higher vocational training), mid-high (higher vocational training; Bachelor's degree) and high (university level).

**Supplementary Table 3.** Bivariate Pearson's correlations coefficients (*r*) for main study variables<sup>1</sup>

|                                      | Autistic traits <sup>2</sup> –<br>3 y | Autistic traits <sup>2</sup> –<br>6 y | Autistic traits <sup>3</sup> –<br>6 y | Food selectivity <sup>4</sup> –<br>4 y | Diet quality score <sup>5</sup> –<br>8 y |
|--------------------------------------|---------------------------------------|---------------------------------------|---------------------------------------|----------------------------------------|------------------------------------------|
| Autistic traits <sup>2</sup> – 1.5 y | 0.43                                  | 0.31                                  | 0.30                                  | 0.10                                   | -0.08                                    |
| Autistic traits <sup>2</sup> – 3 y   | -                                     | 0.49                                  | 0.38                                  | 0.14                                   | -0.06                                    |
| Autistic traits <sup>2</sup> – 6 y   | -                                     | -                                     | 0.59                                  | 0.13                                   | -0.06                                    |
| Autistic traits <sup>3</sup> – 6 y   | -                                     | -                                     | -                                     | 0.09                                   | -0.08                                    |
| Food selectivity <sup>4</sup> – 4 y  | -                                     | -                                     | -                                     | -                                      | -0.19                                    |

<sup>1</sup> $P < 0.001$  for all coefficients; *n* ranges from 3281-3691; <sup>2</sup>Pervasive Developmental Problems subscale from the Child Behavior

Checklist/1.5-5 (20); <sup>3</sup>Social Responsiveness Scale (22); <sup>4</sup>Food fussiness subscale of the Children's Eating Behaviour Questionnaire

(29); <sup>5</sup>Developed by van der Velde et al.(28)

**Supplementary Table 4.** Multiple Linear Regressions showing associations between autistic traits at various child ages and food component scores<sup>1</sup>

| Food component score <sup>2</sup> | Autistic traits <sup>3</sup> |                       |                         | Autistic trait trajectory <sup>4</sup>                        |
|-----------------------------------|------------------------------|-----------------------|-------------------------|---------------------------------------------------------------|
|                                   | 1.5 y<br>n=3629              | 3 y<br>n=3679         | 6 y<br>n=3898           | Low and stable<br>(referent group) vs.<br>High and increasing |
|                                   | $\beta$ (95%CI)              | $\beta$ (95%CI)       | $\beta$ (95%CI)         | $\beta$ (95%CI)                                               |
| Fruit                             | -0.02 (-0.03, -0.01)         | -0.01 (-0.02, -0.004) | -0.01 (-0.02, -0.004)   | -0.04 (-0.08, -0.01)                                          |
| Vegetables                        | -0.02 (-0.03, -0.01)         | -0.02 (-0.03, -0.01)  | -0.02 (-0.02, -0.01)    | -0.05 (-0.08, -0.01)                                          |
| Whole grains                      | -0.02 (-0.02, -0.01)         | -0.01 (-0.02, -0.01)  | -0.01 (-0.02, -0.00002) | -0.03 (-0.07, 0.01)                                           |
| Fish                              | -0.01 (-0.02, 0.01)          | -0.02 (-0.03, -0.003) | -0.03 (-0.04, -0.01)    | -0.09 (-0.15, -0.03)                                          |
| Legumes                           | 0.00 (-0.02, 0.01)           | 0.00 (-0.01, 0.01)    | 0.00 (-0.02, 0.01)      | -0.01 (-0.06, -0.05)                                          |
| Nuts                              | -0.01 (-0.02, 0.01)          | 0.00 (-0.01, 0.01)    | 0.00 (-0.01, 0.01)      | 0.00 (-0.05, 0.05)                                            |
| Dairy                             | 0.00 (-0.01, 0.01)           | 0.00 (-0.01, 0.01)    | 0.00 (-0.02, 0.01)      | 0.00 (-0.06, 0.05)                                            |
| Oils                              | -0.01 (-0.02, -0.004)        | -0.01 (-0.02, 0.003)  | -0.01 (-0.02, 0.001)    | -0.04 (-0.08, 0.002)                                          |
| Sugary drinks                     | -0.002 (-0.01, 0.01)         | 0.00 (-0.01, 0.01)    | 0.00 (-0.01, 0.003)     | -0.01 (-0.04, 0.03)                                           |
| Processed meat                    | -0.001 (-0.01, 0.01)         | 0.01 (-0.002, 0.01)   | 0.00 (-0.005, 0.01)     | 0.00 (-0.03, 0.03)                                            |

<sup>1</sup>Values are pooled standardized regression coefficients (95% Confidence Intervals). All models adjust for the child energy intake, sex, age, ethnicity, birth weight, BMIz score (6 y), maternal age at recruitment and education. <sup>2</sup>Derived from van der Velde et al.(28).

<sup>3</sup>Measured using the Child Behavior Checklist/1.5-5 (20). <sup>4</sup>Latent Class Growth Analysis categories: Low and stable ( $n=3885$ , 95%) and High and increasing ( $n=207$ , 5%)

**Supplementary Table 5.** Multiple Linear Regressions showing associations between food selectivity at child age 4 y and food component scores at 8 y<sup>1</sup>

| Food component score <sup>2</sup> | Food selectivity <sup>3</sup> |
|-----------------------------------|-------------------------------|
|                                   | $\beta$ (95% CI)              |
| Fruit                             | -0.03 (-0.04, -0.03)          |
| Vegetables                        | -0.05 (-0.06, -0.04)          |
| Whole grains                      | 0.00 (-0.01, 0.004)           |
| Fish                              | -0.07 (-0.08, -0.05)          |
| Legumes                           | -0.05 (-0.07, -0.04)          |
| Nuts                              | -0.02 (-0.03, -0.01)          |
| Dairy                             | 0.00 (-0.01, 0.01)            |
| Oils and soft margarines          | -0.01 (-0.02, 0.003)          |
| Sugar containing beverages        | 0.00 (-0.003, 0.01)           |
| High-fat and processed meat       | 0.00 (-0.01, 0.002)           |

<sup>1</sup>Values are pooled standardized regression coefficients (95% Confidence Intervals),  $n=3360$ . All models adjust for child energy intake, sex, age, ethnicity, birth weight, BMIz score (6 y), maternal age at recruitment and education. <sup>2</sup>Derived from van der Velde et al.(28). <sup>3</sup>Food fussiness subscale from the Children's Eating Behaviour Questionnaire (29)

**Supplementary Table 6.** Direct and indirect effects of the associations between autistic traits at 1.5 y and food component scores at 8 y through food selectivity at 4 y<sup>1</sup> (*n*=3360)

| Mediation model                                 | $\beta$ (95% CI)     |
|-------------------------------------------------|----------------------|
| Fruit score <sup>2</sup>                        |                      |
| Autistic traits <sup>3</sup> (direct effect)    | -0.07 (-0.11, -0.04) |
| Food selectivity <sup>4</sup> (indirect effect) | -0.01 (-0.02, -0.01) |
| Vegetables score <sup>2</sup>                   |                      |
| Autistic traits <sup>3</sup> (direct effect)    | -0.06 (-0.09, -0.03) |
| Food selectivity <sup>4</sup> (indirect effect) | -0.02 (-0.02, -0.01) |

<sup>1</sup>Values are standardized regression coefficients (95% Confidence Intervals). Models adjust for the child energy intake, sex, age, ethnicity, birth weight, BMI<sub>z</sub> score (6 y), maternal age at recruitment and education. <sup>2</sup>Derived from van der Velde et al.(28). <sup>3</sup>Measured using the Pervasive Developmental Problems subscale from the Child Behavior Checklist/1.5-5 (20).

<sup>4</sup>Food fussiness subscale from the Children's Eating Behaviour Questionnaire (29)

## Supplementary Figure 1. Study participant flow chart

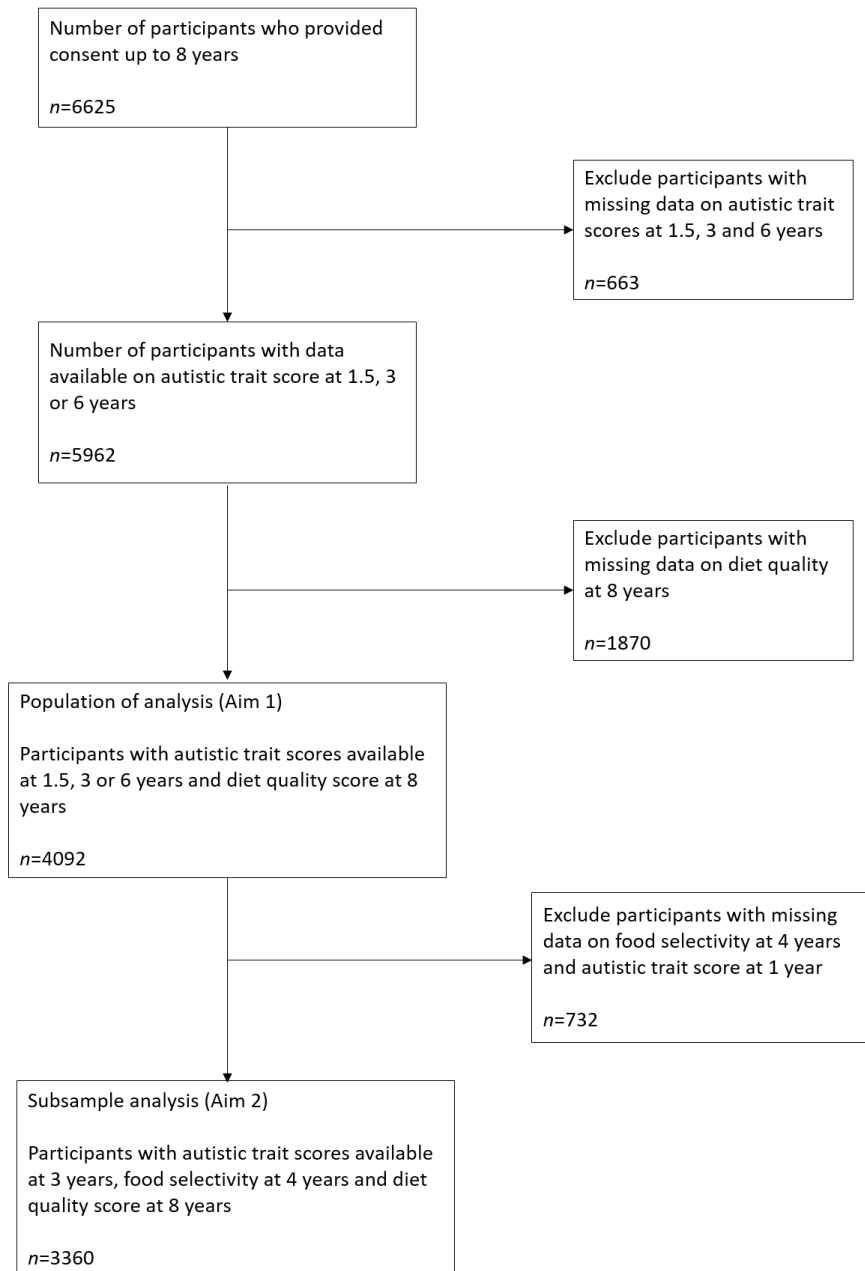

Supplement: nxab413_supplemental_file.pdf [file nxab413_supplemental_file.pdf]
